# Supplementary material for: The Evaluation of Vascular Endothelial Growth Factor A (VEGFA) and VEGFR2 Receptor as Prognostic Biomarkers in Bladder Cancer
Source: MDPI journal article supplement (doi:10.3390/diagnostics13081471), 2023-04-19
Supplement: s1 [file s1]

# Supplementary Materials: The Evaluation of Vascular Endothelial Growth Factor A (VEGFA) and VEGFR2 Receptor as Prognostic Biomarkers in Bladder Cancer

Meryem El Azzouzi <sup>1,2,†</sup>, Hajar El Ahanidi <sup>1,3,†</sup>, Chaimae Hafidi Alaoui <sup>1,4</sup>, Imane Chaoui <sup>1</sup>, Laila Benbacer <sup>1</sup>, Mohammed Tetou <sup>2,5</sup>, Ilias Hassan <sup>2,5</sup>, Mounia Bensaid <sup>6</sup>, Mohamed Oukabli <sup>2,6</sup>, Ahmed Ameer <sup>2,5</sup>, Abderrahmane Al Bouzidi <sup>2</sup>, Mohammed Attaleb <sup>1,7,\*</sup> and Mohammed El Mzibri <sup>1,†</sup>

**Table S1.** Association between VEGFA -460 T/C polymorphism and clinical pathological features of BC patients

|             | N  | Genotype       |          |          |          | Allele   |          |          |
|-------------|----|----------------|----------|----------|----------|----------|----------|----------|
|             |    | VEGFA -460 T/C |          |          |          |          |          |          |
|             |    | CC (%)         | CT (%)   | TT (%)   | <i>p</i> | C (%)    | T (%)    | <i>p</i> |
| Gender      |    |                |          |          |          |          |          |          |
| Male        | 68 | 36 (52.9)      | 14(20.6) | 18(26.5) | 0.36     | 86(63.2) | 50(36.8) | 0.29     |
| Female      | 2  | 0              | 1(50)    | 1(50)    |          | 1(25)    | 3(75)    |          |
| Age         |    |                |          |          |          |          |          |          |
| ≤ 50        | 1  | 1(100)         | 0        | 0        | 0.51     | 2(100)   | 0        | 0.39     |
| 50-70       | 44 | 23(52.3)       | 8(18.2)  | 13(29.5) |          | 54(61.4) | 34(38.6) |          |
| >70         | 25 | 12(48)         | 7(28)    | 6(24)    |          | 31(62)   | 19(38)   |          |
| Smoking     |    |                |          |          |          |          |          |          |
| Yes         | 28 | 18(64.3)       | 8(28.6)  | 2(7.1)   | 0.02     | 44(78.6) | 12(21.4) | 0.003    |
| No          | 42 | 18(42.9)       | 7(16.6)  | 17(40.5) |          | 43(51.2) | 41(48.8) |          |
| Stage       |    |                |          |          |          |          |          |          |
| ≤ Pt1       | 52 | 27(51.9)       | 9(17.3)  | 16(30.8) | 0.79     | 63(60.6) | 41(39.4) | 0.75     |
| > Pt1       | 18 | 9(50)          | 6(33.4)  | 3(16.6)  |          | 24(66.6) | 12(33.4) |          |
| Grade       |    |                |          |          |          |          |          |          |
| Low         | 27 | 15(55.6)       | 5(18.5)  | 7(25.9)  | 0.51     | 35(64.8) | 19(35.2) | 0.41     |
| High        | 43 | 21(48.8)       | 10(23.3) | 12(27.9) |          | 52(60.5) | 34(39.5) |          |
| Recurrence  |    |                |          |          |          |          |          |          |
| Yes         | 12 | 8(66.7)        | 1(8.3)   | 3(25)    | 0.37     | 17(70.8) | 7(29.2)  | 0.24     |
| No          | 40 | 19(47.5)       | 8(20)    | 13(32.5) |          | 46(57.5) | 34(42.5) |          |
| Progression |    |                |          |          |          |          |          |          |
| Yes         | 5  | 2(40)          | 2(40)    | 1(20)    | 0.89     | 6(60)    | 4(40)    | 0.86     |
| No          | 47 | 25(53.2)       | 7(14.9)  | 15(31.9) |          | 57(60.6) | 37(39.4) |          |

**Table S2.** Association between VEGFA -2578 C/A polymorphism and clinical pathological features of BC patients.

|             | N  | Genotype        |          |          | Allele   |          |          |       |
|-------------|----|-----------------|----------|----------|----------|----------|----------|-------|
|             |    | VEGFA -2578 C/A |          |          |          |          | <i>p</i> |       |
|             |    | AA (%)          | AC (%)   | CC (%)   | <i>p</i> | A (%)    |          | C (%) |
| Gender      |    |                 |          |          |          |          |          |       |
| Male        | 68 | 21(30.9)        | 28(41.2) | 19(27.9) | 0.21     | 70(51.5) | 66(48.5) | 0.21  |
| Female      | 2  | 1(50)           | 1(50)    | 0        |          | 3(75)    | 1(25)    |       |
| Age         |    |                 |          |          |          |          |          |       |
| ≤ 50        | 1  | 1(100)          | 0        | 0        | 0.40     | 2 (100)  | 0        | 0.35  |
| 50-70       | 44 | 12(27.3)        | 22(50)   | 10(22.7) |          | 46(52.3) | 42(47.7) |       |
| >70         | 25 | 9(36)           | 7(28)    | 9(36)    |          | 25(50)   | 25(50)   |       |
| Smoking     |    |                 |          |          |          |          |          |       |
| Yes         | 28 | 11(39.3)        | 13(46.4) | 4(14.3)  | 0.07     | 35(62.5) | 21(37.5) | 0.06  |
| No          | 42 | 11(26.2)        | 16(38.1) | 15(35.7) |          | 38(45.2) | 46(54.8) |       |
| Stage       |    |                 |          |          |          |          |          |       |
| ≤ Pt1       | 52 | 15(28.8)        | 21(40.4) | 16(30.8) | 0.73     | 51(49)   | 53(51)   | 0.71  |
| > Pt1       | 18 | 7(38.9)         | 8(44.4)  | 3(16.7)  |          | 22(61.1) | 14(38.9) |       |
| Grade       |    |                 |          |          |          |          |          |       |
| Low         | 27 | 6(22.2)         | 13(48.1) | 8(29.7)  | 0.31     | 25(46.3) | 29(53.7) | 0.27  |
| High        | 43 | 16(37.2)        | 16(37.2) | 11(25.6) |          | 48(55.8) | 38(44.2) |       |
| Recurrence  |    |                 |          |          |          |          |          |       |
| Yes         | 12 | 4(33.3)         | 5(41.7)  | 3(25)    | 0.60     | 13(54.2) | 11(45.8) | 0.55  |
| No          | 40 | 11(27.5)        | 16(40)   | 13(32.5) |          | 38(47.5) | 42(52.5) |       |
| Progression |    |                 |          |          |          |          |          |       |
| Yes         | 5  | 1(20)           | 3(60)    | 1(20)    | 0.88     | 5(50)    | 5(50)    | 0.87  |
| No          | 47 | 14(29.8)        | 18(38.3) | 15(31.9) |          | 46(48.9) | 48(51.1) |       |

**Table S3.** Association between VEGFA -2549I/D polymorphism and clinical pathological features of BC patients.

|             | N  | Genotype        |          |          |          | Allele   |          |      |
|-------------|----|-----------------|----------|----------|----------|----------|----------|------|
|             |    | VEGFA -2549 I/D |          |          |          |          |          |      |
|             |    | II (%)          | ID (%)   | DD (%)   | <i>p</i> | I (%)    | D (%)    |      |
| Gender      |    |                 |          |          |          |          |          |      |
| Male        | 68 | 22(32.4)        | 24(35.3) | 22(32.3) | 0.17     | 68(50)   | 68(50)   | 0.15 |
| Female      | 2  | 1(50)           | 1(50)    | 0        |          | 3(75)    | 1(25)    |      |
| Age         |    |                 |          |          |          |          |          |      |
| ≤ 50        | 1  | 1(100)          | 0        | 0        | 0.56     | 2(100)   | 0        | 0.51 |
| 50-70       | 44 | 12(27.3)        | 19(43.2) | 13(29.5) |          | 43(48.9) | 45(51.1) |      |
| >70         | 25 | 10(40)          | 6(24)    | 9(36)    |          | 26(52)   | 24(48)   |      |
| Smoking     |    |                 |          |          |          |          |          |      |
| Yes         | 28 | 11(39.3)        | 11(39.3) | 6(21.4)  | 0.17     | 33(58.9) | 23(41.1) | 0.11 |
| No          | 42 | 12(28.6)        | 14(33.3) | 16(38.1) |          | 38(45.2) | 46(54.8) |      |
| Stage       |    |                 |          |          |          |          |          |      |
| ≤ Pt1       | 52 | 15(28.9)        | 18(34.6) | 19(36.5) | 0.53     | 48(46.2) | 56(53.8) | 0.47 |
| > Pt1       | 18 | 8(44.4)         | 7(38.9)  | 3(16.7)  |          | 23(63.9) | 13(36.1) |      |
| Grade       |    |                 |          |          |          |          |          |      |
| Low         | 27 | 6(22.3)         | 10(37)   | 11(40.7) | 0.15     | 22(40.7) | 32(59.3) | 0.11 |
| High        | 43 | 17(39.5)        | 15(34.9) | 11(25.6) |          | 49(57)   | 37(37)   |      |
| Recurrence  |    |                 |          |          |          |          |          |      |
| Yes         | 12 | 4(33.3)         | 3(25)    | 5(41.7)  | 0.93     | 11(45.8) | 13(54.2) | 0.98 |
| No          | 40 | 11(27.5)        | 15(37.5) | 14(35)   |          | 37(46.3) | 43(53.7) |      |
| Progression |    |                 |          |          |          |          |          |      |
| Yes         | 5  | 1(20)           | 3(60)    | 1(20)    | 0.83     | 5(50)    | 5(50)    | 0.79 |
| No          | 47 | 14(29.8)        | 15(31.9) | 18(38.3) |          | 43(45.7) | 51()     |      |
